# Supplementary material
Source: MDPI journal article supplement (https://www.mdpi.com/2076-3417/11/4/1746)
Supplement: s1 [file s1]

# Supplementary Material

## Novel hydroxyapatite beads for the adsorption of radionuclides from the decommissioning site nuclear power plants

Thi Nhung Tran <sup>1</sup>, Junho Kim <sup>1</sup>, Joo-Sung Park <sup>1</sup>, Youngkun Chung <sup>1</sup>, Jaemun Han <sup>2</sup>, Seungjun Oh <sup>2</sup> and Seoktae Kang <sup>1,\*</sup>

<sup>1</sup> Department of Civil and Environmental Engineering, Korea Advanced Institute of Science and Technology (KAIST), 291 Daehak-ro, Yuseong-gu, Daejeon 34141, Korea; trannhung@kaist.ac.kr (T.N.T.); kjh2020@kaist.ac.kr (J.K.); jspark235@kaist.ac.kr (J.-S.P.); jyk0524@kaist.ac.kr (Y.C.)

<sup>2</sup> Hyundai Engineering & Construction, Hyundai Bldg. 75, Yulgok-ro, Jongno-gu, Seoul 03058, Korea; jmhan@hdec.co.kr (J.H.); ohseungjun@hdec.co.kr (S.O.)

\* Correspondence: stkang@kaist.ac.kr; Tel.: +82-42-350-3635

Table 1. Adsorption isotherm models.

| Isotherms models | Equations                                                |
|------------------|----------------------------------------------------------|
| Langmuir         | $q_e = q_{\max} \frac{K_L C_e}{1 + K_L C_e}$             |
| Freundlich       | $q_e = K_F C_e^{1/n}$                                    |
| Sips             | $q_e = q_{\max} \frac{K_S C_e^{n_s}}{1 + K_S C_e^{n_s}}$ |
| Tempkin          | $q_e = \frac{RT}{b_T} \ln A_T C_e$                       |

where  $q_e$  (mg/g) is the quantity of adsorbate adsorbed on a unit mass of the b-HdA;  $q_{\max}$  (mg/g) is the maximum adsorption capacity;  $K_L$  (L/mg) is the Langmuir adsorption constant;  $K_F$  (mg/g (L/mg)<sup>1/n</sup>) is the Freundlich constant;  $1/n$  is a measurement of the adsorption intensity;  $R$  (8.314 J/mol K) is the gas constant;  $T$  is the absolute temperature (K);  $n_s$  is the Sips model exponent of the adsorbent, and  $K_S$  (1/mg) is the Sips constant;  $b_T$  (J/mol) is the Tempkin constant associated to the heat of adsorption;  $A_T$  (L/mg) is the Tempkin equilibrium constant.

Table 2. Thermodynamic analysis.

$$K_0 = \frac{a_s}{a_e} = \frac{\gamma_s C_s}{\gamma_e C_e}$$
$$\Delta G^0 = -RT \ln(K_0)$$
$$\ln(K_0) = -\frac{\Delta H^0}{R} \frac{1}{T} + \frac{\Delta S^0}{R}$$

where  $a_s$  and  $\gamma_s$  are the activity and activity coefficient of adsorbed Co(II), respectively;  $a_e$  and  $\gamma_e$  are the activity and activity coefficient of Co(II) in the solution at equilibrium, respectively;  $C_s$  and  $C_e$  (mg/L) are the adsorbed and equilibrium concentration of Co(II), respectively;  $K_0$  is the thermodynamic equilibrium constant;  $\Delta G^0$  (kJ/mol) is the standard Gibbs free energy change; ( $\Delta H^0$ ) is the standard enthalpy change;  $\Delta S^0$  (J/mol K) is the standard entropy change.

**Table 3.** Adsorption kinetic models.

| Kinetic models           | Equations                                                                                                                                    |
|--------------------------|----------------------------------------------------------------------------------------------------------------------------------------------|
| Pseudo first order       | $\log(q_e - q_t) = \log q_e - \frac{k_1}{2.303}t$                                                                                            |
| Pseudo second order      | $\frac{t}{q_t} = \frac{1}{k_2 q_e^2} + \frac{1}{q_e}t$                                                                                       |
| Intra-particle diffusion | $q_t = k_{id}t^{0.5} + I$<br>$\frac{C_t}{C_o} = \frac{(1 - \xi_1)(1 - \xi_1 - \beta \xi_2)}{(1 - \xi_1 - \beta \xi_2 e^{-\gamma t})}$        |
| Three-stage              | $\xi_1 = \frac{mq_1(\infty)}{VC_o}$<br>$\xi_2 = \frac{mq_2(\infty)}{VC_o}$<br>$\gamma = \frac{(1 - \xi_1 - \beta \xi_2)\alpha}{\beta \xi_2}$ |

where  $q_e$  and  $q_t$  (mg/g) are the adsorption capacity at equilibrium conditions and at contact time  $t$  (h), respectively;  $k_1$  (1/h) and  $k_2$  (g/mg h) are the pseudo-first-order and pseudo-second-order rate constant, respectively;  $I$  (intercept) is an arbitrary constant, and  $k_{id}$  (mg/g h<sup>0.5</sup>) is the rate constant;  $C_t$  (mg/L) are the concentrations of adsorbate at contact time  $t$ ;  $C_t/C_o$  is the relative aqueous concentration; and  $q_1(\infty)$  and  $q_2(\infty)$  are the adsorption capacity for the instantaneous adsorption and the interior sites at infinite time, respectively;  $\xi_1$  and  $\xi_2$  are the fractions between the amount of the adsorbate adsorbed onto the external surface and into the interior adsorptive sites, respectively, with the total quantity of the initial adsorbate at the infinite time;  $\alpha$  (1/h) is the rate constant;  $\beta$  is a limiting factor for  $q_2(\infty)$  ( $0 < \beta \leq 1$ ).

**Table S4.** Chemical properties of selected radionuclides.

| Ions   | Ionic radius (nm) | Hydration radius (nm) [2,3] | Pauling's Electro-negativity [1] | Hydration enthalpy (kJ/mol) | Charge density (C/mm <sup>3</sup> ) |
|--------|-------------------|-----------------------------|----------------------------------|-----------------------------|-------------------------------------|
|        | [1]               |                             |                                  | [1]                         | [4]                                 |
| Ca(II) | 0.100             | 0.412                       | 1.00                             | -1600                       | 52                                  |
| Co(II) | 0.075             | 0.423                       | 1.88                             | -2035                       | 155                                 |
| Ni(II) | 0.069             | 0.404                       | 1.91                             | -2115                       | 134                                 |
| Sr(II) | 0.125             | 0.412                       | 0.95                             | -1470                       | 33                                  |
| Cs(I)  | 0.170             | 0.329                       | 0.79                             | -280                        | 6                                   |
| U(VI)  | 0.175             | 0.251                       | 1.38                             | -1360                       | 348                                 |

## References

- Marcus, Y. A simple empirical model describing the thermodynamics of hydration of ions of widely varying charges, sizes, and shapes. *Biophys. Chem.* **1994**, *51*, 111–127.
- Nightingale, E.R. Phenomenological Theory of Ion Solvation. Effective Radii of Hydrated Ions. *J. Phys. Chem.* **1959**, *63*, 1381–1387.
- Atta-Fynn, R.; Johnson, D.F.; Bylaska, E.J.; Ilton, E.S.; Schenter, G.K.; de Jong, W.A. Structure and Hydrolysis of the U(IV), U(V), and U(VI) Aqua Ions from Ab Initio Molecular Simulations. *Inorg. Chem.* **2012**, *51*, 3016–3024.
- Rayner-Canham, G., Overton, T. Charge Densities of Selected Ions. In *Descriptive Inorganic Chemistry*, 5th ed.; Jessica F., Kathryn, T., Eds.; Publisher: W.H. Freeman New York, USA, 2010; pp. A13–A15.
